# Supplementary material for: One-step potentiodynamic synthesis of poly(1,5-diaminoanthraquinone)/reduced graphene oxide nanohybrid with improved electrocatalytic activity
Source: Royal Society of Chemistry journal article supplement (doi:10.1039/c3ta13600k), 2013-01-01
Supplement: c3ta13600k.pdf [file c3ta13600k.pdf]

# Electronic Supplementary Information for

## One-Step Potentiodynamic Synthesis of Poly(1,5-diaminoanthraquinone)/Reduced Graphene Oxide Nanohybrid with Improved Electrocatalytic Activity

Haiyan Liu,<sup>a</sup> Guoquan Zhang,<sup>\*a</sup> Yufei Zhou,<sup>a</sup> Mingming Gao<sup>b</sup> and Fenglin Yang<sup>\*a</sup>

<sup>a</sup> Key Laboratory of Industrial Ecology and Environmental Engineering, Ministry of Education, School of Environmental Science and Technology, Dalian University of Technology, Linggong Road 2, Dalian 116023, P. R. China.

<sup>b</sup> Shandong Provincial Key Laboratory of Water Pollution Control and Resource Reuse, School of Environmental Science and Engineering, Shandong University, Jinan 250100, P. R. China.

### CORRESPONDING AUTHOR FOOTNOTE

\* Corresponding author.

Tel: +86-411-84706172;

Fax: +86-411-84706328.

E-mail: [guoquanz@126.com](mailto:guoquanz@126.com) (G. Q. Zhang)

[yangfl@dlut.edu.cn](mailto:yangfl@dlut.edu.cn) (F. L. Yang)

### Preparation of Graphene Oxide

Typical synthesis process of GO was as follows:<sup>1,2</sup> graphite powder (10 g, 600 mesh), K<sub>2</sub>S<sub>2</sub>O<sub>8</sub> (5 g) and P<sub>2</sub>O<sub>5</sub> (5 g) were added to an 80 °C solution of 100 mL concentrated H<sub>2</sub>SO<sub>4</sub>, keeping stirring for 6 h. Then the mixture was cooled in room temperature for 12 h, followed by washed with distilled water until it became neutral and dried. The pre-oxidized graphite (10 g) was placed in a flask. Concentrated H<sub>2</sub>SO<sub>4</sub> (230 mL) was added slowly with stirring in an ice-water bath while the temperature was controlled not to exceed 20 °C. Then, KMnO<sub>4</sub> (30 g) was added gradually and keep stirring for 2 h. The solution was then stirred at 35 ± 3 °C for 2 h. 460 mL of distilled water was slowly added to cause an increase in temperature to 85 °C, and the solution was kept at the temperature for 30 min. 1.4 L of distilled water and 25 mL of 30 wt% H<sub>2</sub>O<sub>2</sub> were added, the color of the mixture was bright yellow. After placed for 24 h, the product was filtered and washed with 5wt% HCl aqueous solution until there was no SO<sub>4</sub><sup>2-</sup>. The product was then centrifuged and the precipitate was directly dried on the glass with a thin layer or the precipitate was directly dispersed in the aqueous solution by using a supersonic cleaner for next experimental step.

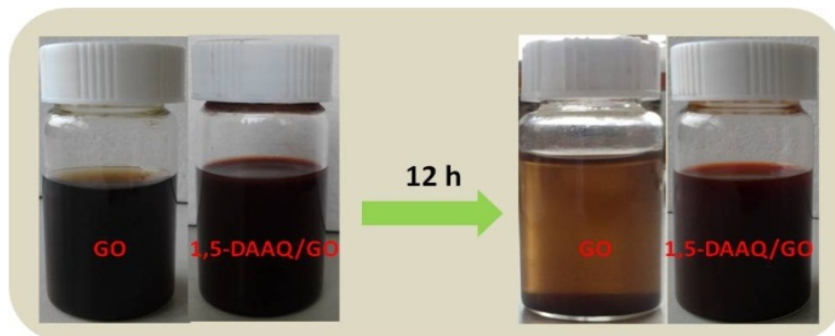

Fig. S1 Photograph of the dispersion of GO and 1,5-DAAQ/GO in ethanol.

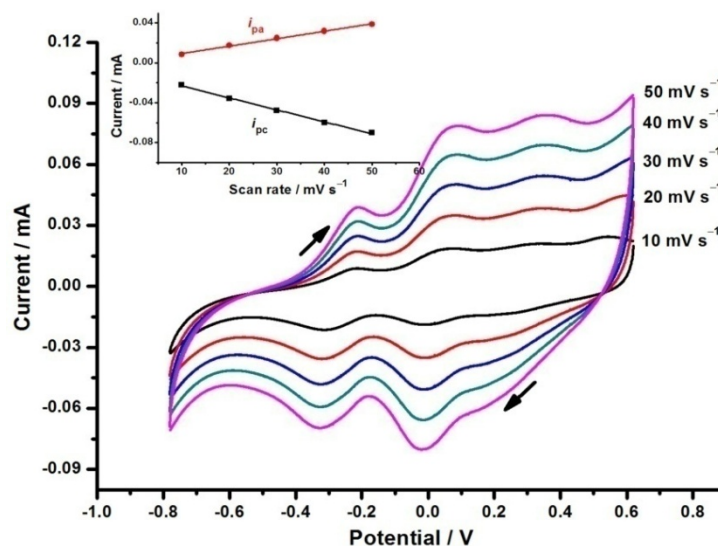

Fig. S2 CVs of P(1,5-DAAQ)/RGO-GCE in  $N_2$ -saturated 1.0 M  $H_2SO_4$  solution at various scan rates. The inset shows the plot of peak current ( $i_{pa}$  and  $i_{pc}$ ) vs. scan rate.

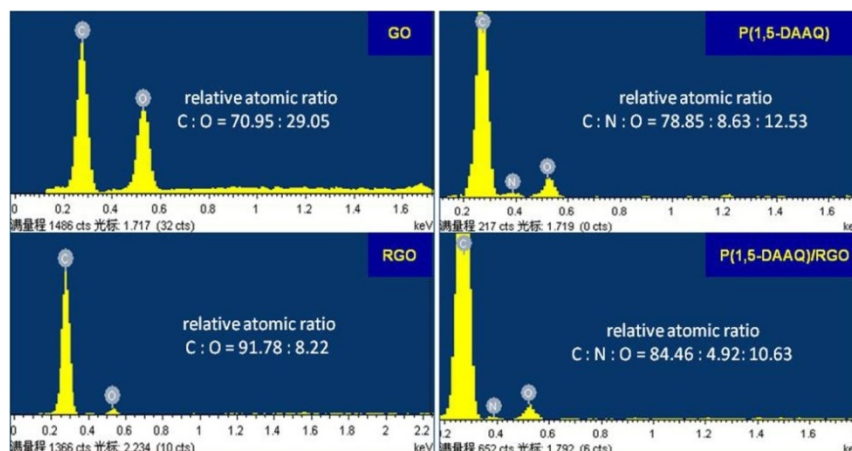

Fig. S3 EDS patterns of GO, P(1,5-DAAQ), RGO and P(1,5-DAAQ)/RGO nanohybrid film, and the corresponding relative atomic ratio.

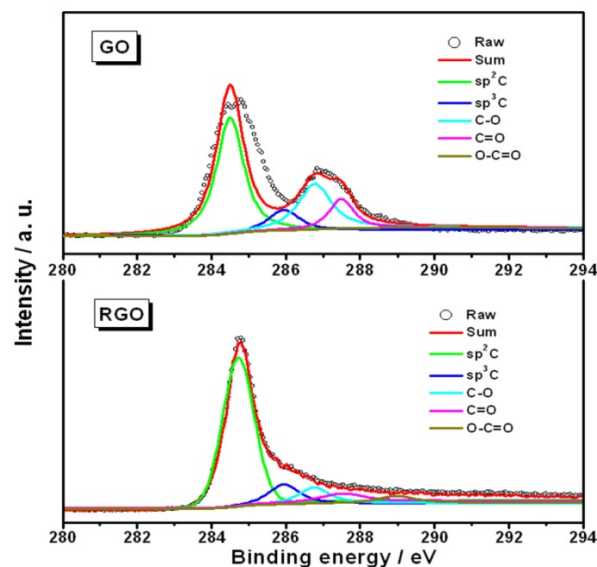

Fig. S4 Deconvoluted C 1s XPS spectra of GO and RGO.

The core level high resolution C 1s XPS spectra of GO and RGO were shown in Fig. S4. From the C 1s XPS spectrum of GO, five different peaks centered at 284.5, 285.6, 286.8, 287.5, and 289.2 eV were observed, which are assigned to  $sp^2$  C,  $sp^3$  C, C–O (hydroxyl and epoxy), C=O (carbonyl) and O–C=O (carboxyl) oxygen-containing functional groups, respectively. These results agree well with those of previous studies.<sup>3-5</sup> After the electro-reduction of GO, the spectrum of RGO shows that the intensities of C 1s peaks of the carbons binding to oxygen and the peak of  $sp^3$  C decrease, while the peak of  $sp^2$  C increases accordingly, revealing that most of the oxygen-containing functional groups are removed and the efficient reduction of GO.

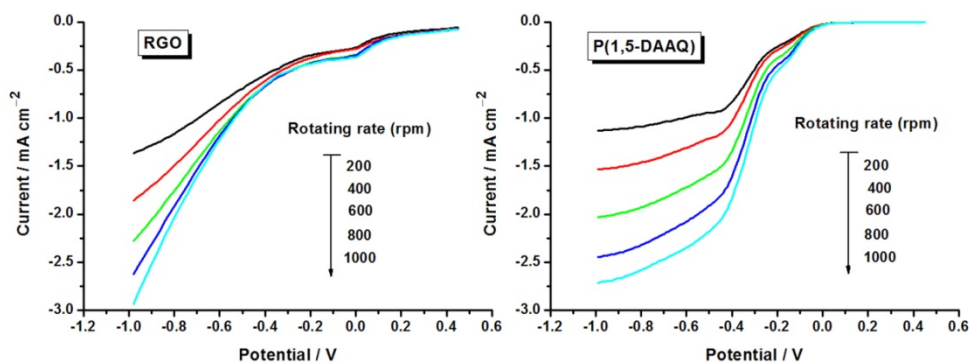

Fig. S5 RDE linear sweep voltammograms of RGO and P(1,5-DAAQ) in  $O_2$ -saturated 1.0 M  $H_2SO_4$  solution with various rotation rates at a scan rate of  $10\text{ mV s}^{-1}$ .

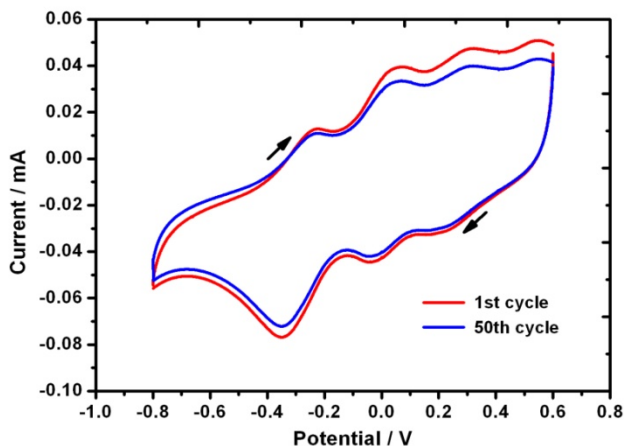

**Fig. S6** The 1st and 50th CV curves of the P(1,5-DAAQ)/RGO-GCE in O<sub>2</sub>-saturated 1.0 M H<sub>2</sub>SO<sub>4</sub> solution at scan rate of 20 mV s<sup>-1</sup>.

**Table S1** Main IR bands (cm<sup>-1</sup>) and their possible assignments of P(1,5-DAAQ)/RGO nanohybrid film and 1,5-DAAQ monomer.

| Possible assignments          | 1,5-DAAQ monomer     | P(1,5-DAAQ)/RGO        |
|-------------------------------|----------------------|------------------------|
| C=O (quinone)                 | 1608                 | 1608                   |
| C=C <sub>aromatic</sub>       | -                    | 1580, 1504             |
| C=N stretch (imino group)     | -                    | 1658                   |
| N-H deformation               | 1545 (primary amine) | 1504 (secondary amine) |
| C-N stretching                | -                    | -                      |
| primary amino group           | 1275                 | 1290                   |
| secondary amino group         | -                    | 1225                   |
| C-N-C stretching              | 1332                 | 1327                   |
| N-H stretching                | -                    | -                      |
| -NH <sub>2</sub> (asymmetric) | 3423                 | -                      |
| -NH <sub>2</sub> (symmetric)  | 3315                 | 3448                   |
| -NH <sub>2</sub> bending      | 494                  | 494 (very weak)        |
| C-H out-of-plane bending      | -                    | -                      |
| of 2H                         | 856                  | 837                    |
| of 3H                         | 705-810              | 710-750                |

## Notes and references

- 1 F. Lima, G. V. Fortunato, and G. Maia, *RSC Adv.*, 2013, **3**, 9550;
- 2 N. I. Kovtyukhova, P. J. Ollivier, B. R. Martin, T. E. Mallouk, S. A. Chizhik, E. V. Buzaneva, and A. D. Gorchinskiy, *Chem. Mater.*, 1999, **11**, 771.
- 3 Z. J. Fan, W. Kai, J. Yan, T. Wei, L. J. Zhi, J. Feng, Y. M. Ren, L. P. Song, and F. Wei, *ACS Nano*, 2011, **5**, 191.
- 4 H. R. Byon, J. Suntivich, and S. H. Yang, *Chem. Mater.*, 2011, **23**, 3421.
- 5 K. R. Lee, K. U. Lee, J. W. Lee, B. T. Ahn, and S. I. Woo, *Electrochem. Commun.*, 2010, **12**, 1052.
